# Supplementary material for: Fluorescence based detection of polychlorinated biphenyls (PCBs) in water using hydrophobic interactions
Source: Royal Society of Chemistry journal article supplement (doi:10.1039/c8an00867a), 2018-11-01
Supplement: c8an00867a1.pdf [file c8an00867a1.pdf]

## **Supplementary Information**

# **Fluorescence Based Detection of Poly Chlorinated Biphenyls (PCBs) in Water Using Hydrophobic Interaction**

Irfan Ahmad,<sup>a</sup> Jiaying Weng,<sup>b</sup> Stromberg AJ,<sup>b</sup> J.Z.Hilt<sup>a</sup> and TD Dziubla<sup>a</sup>

<sup>a</sup> Department of Chemical and Materials Engineering, University of Kentucky,  
Lexington, Kentucky 40506, United States

<sup>b</sup> Department of Statistics, University of Kentucky, Lexington, KY 40536, USA

## BaP interaction with PCBs and other molecules in water

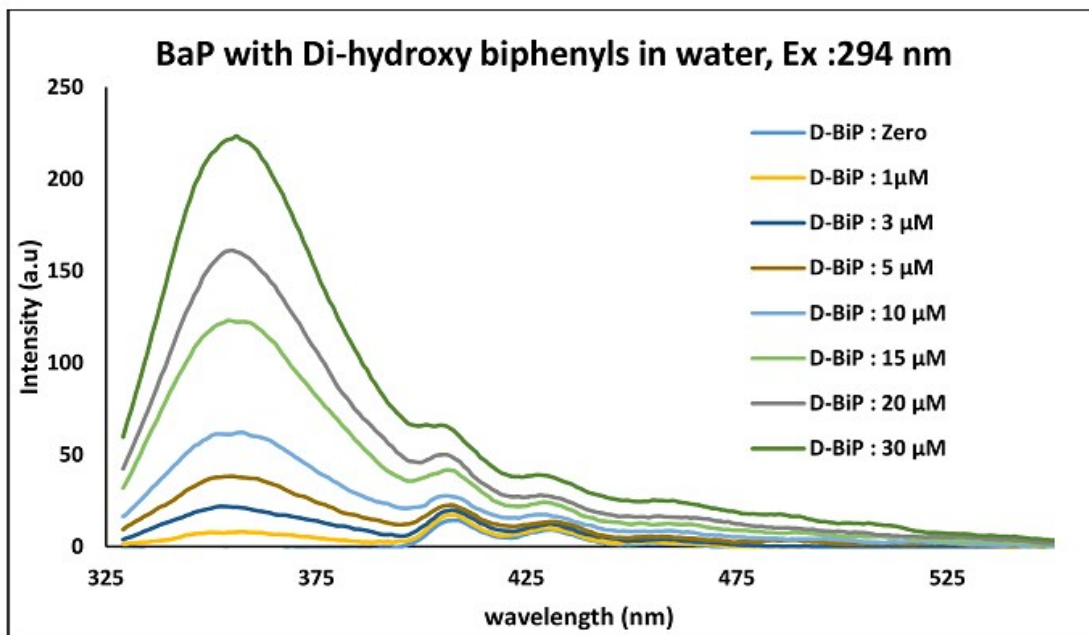

Figure S1a: 4, 4-Dihydroxy biphenyl (D-BiP) interaction with BaP in water.

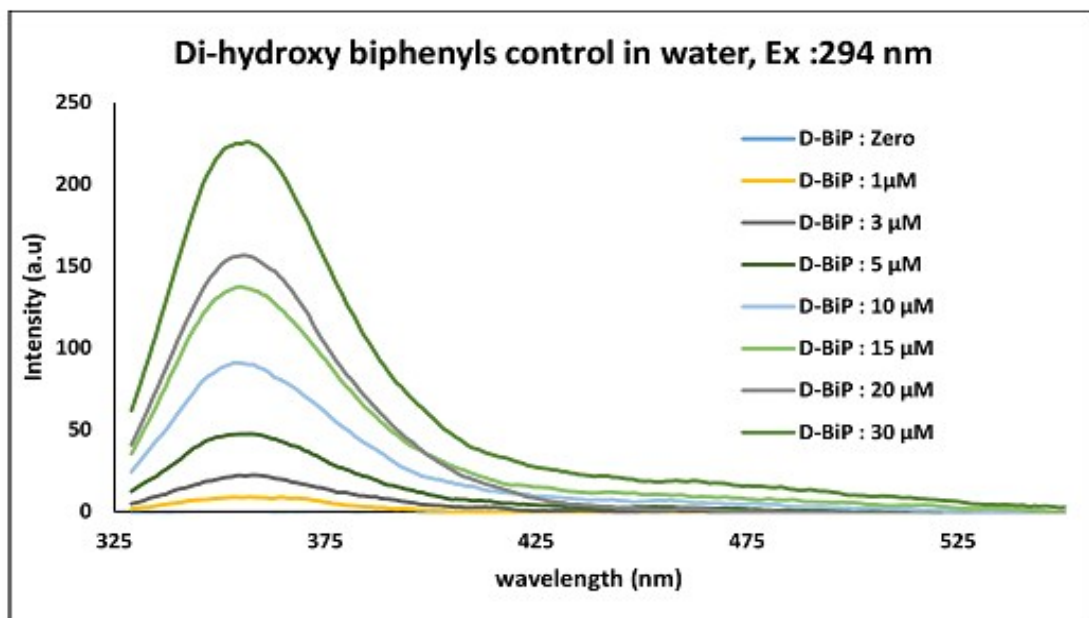

Figure S1b: 4, 4-Dihydroxy biphenyl (D-BiP) control in water.

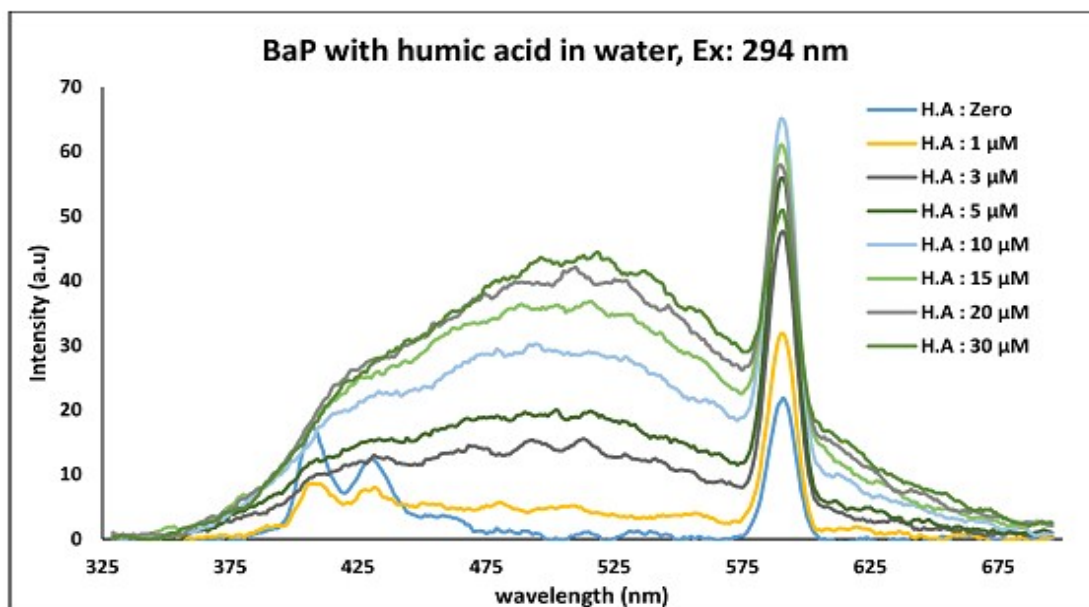

Figure S1c: Humic acid (H.A) interaction with BaP in water.

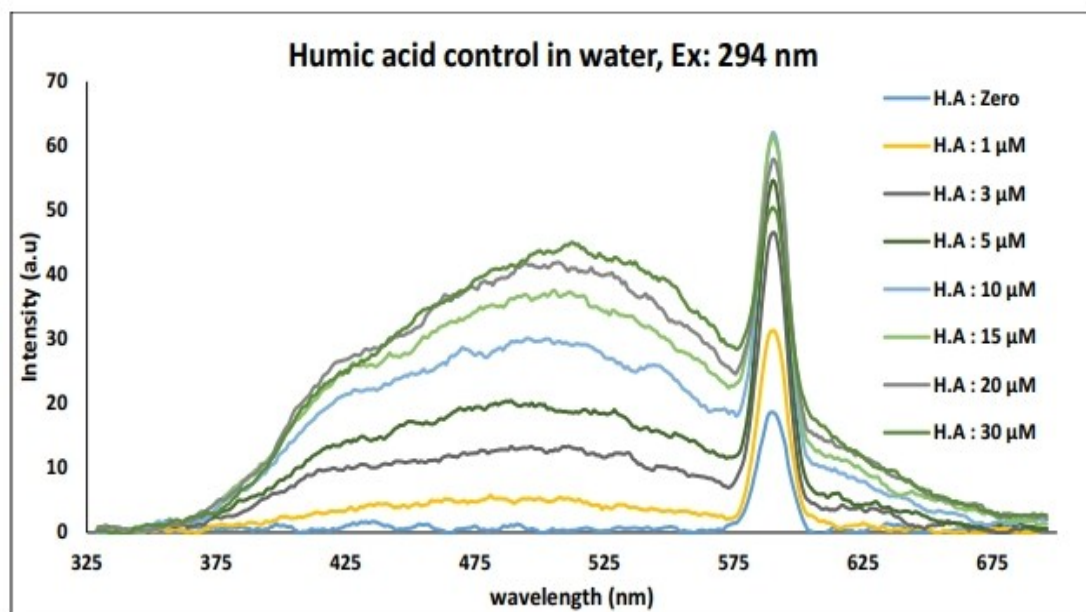

Figure S1d: Humic acid (H.A) control in water.

## BaP interaction with PCBs and other molecules in organic solvent

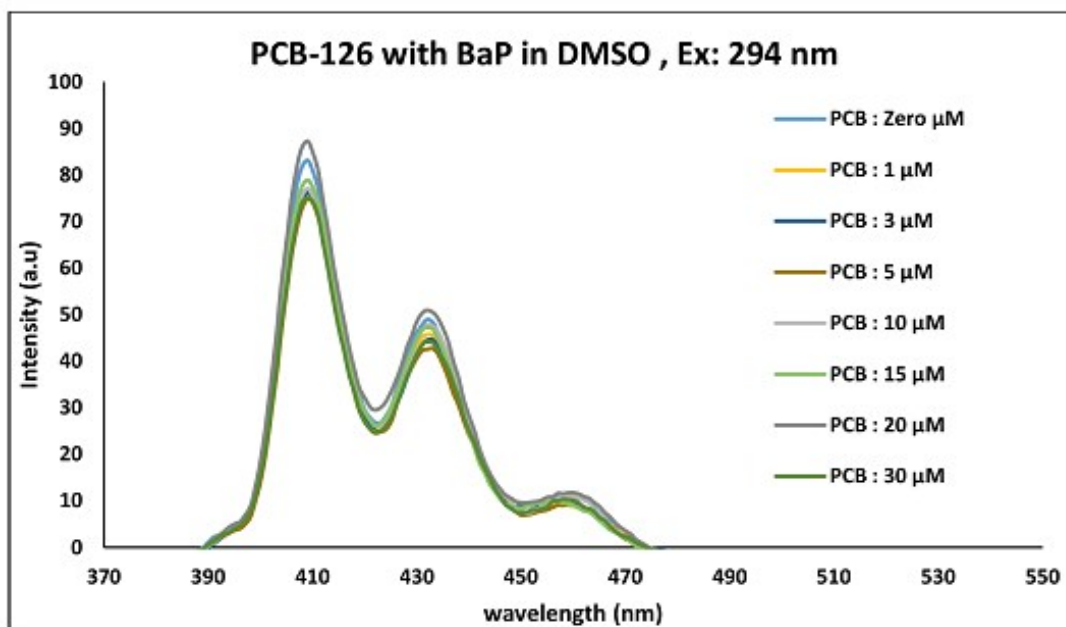

Figure S2a: PCB-126 interaction with BaP in DMSO.

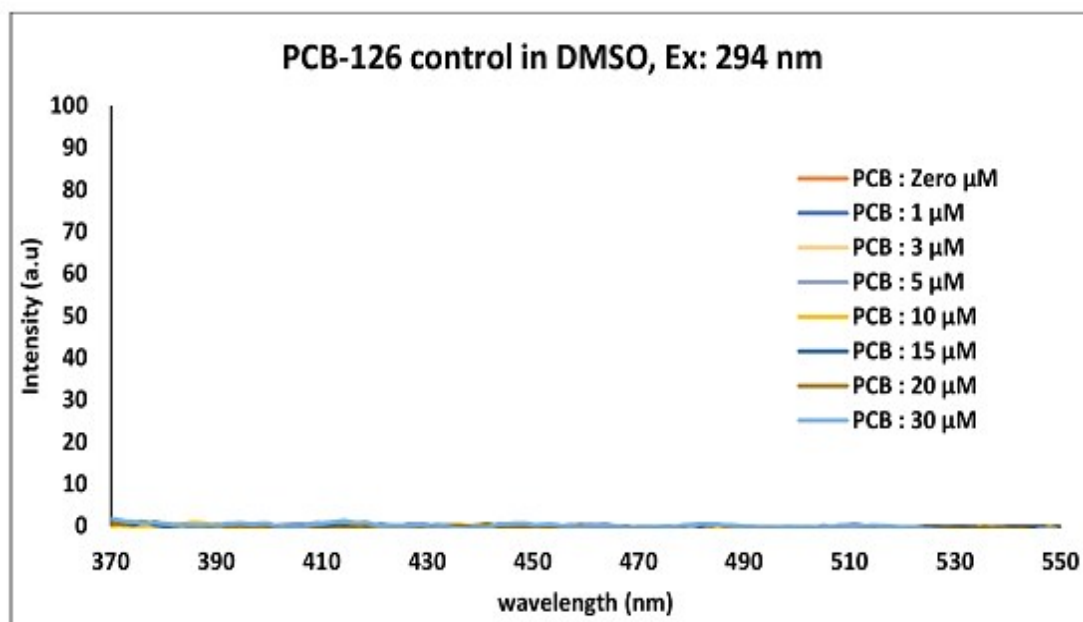

Figure S2b: PCB-126 control in DMSO.

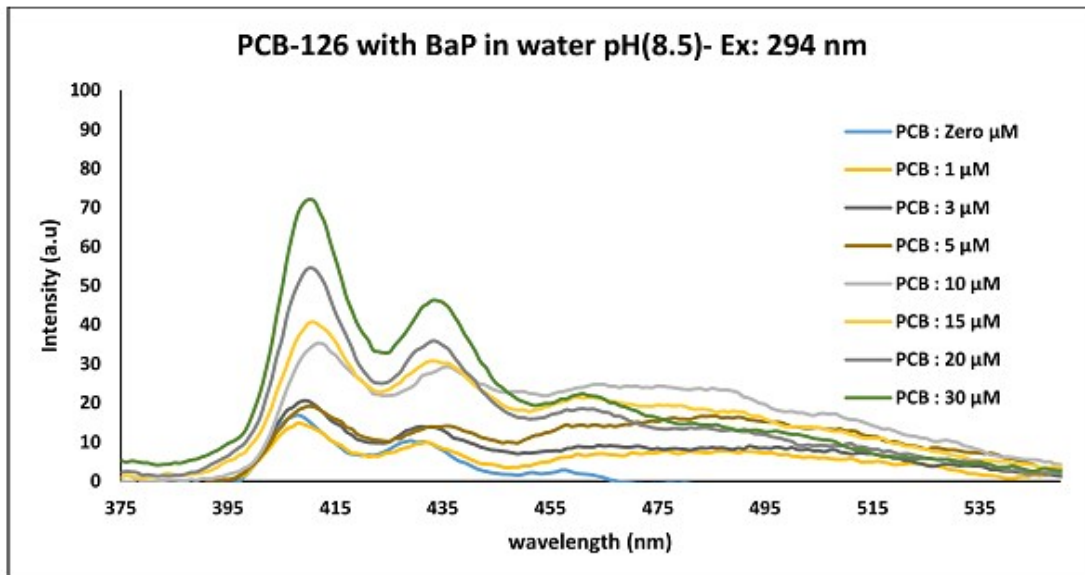

Figure S3: PCB-126 in water with BaP at pH 8.5

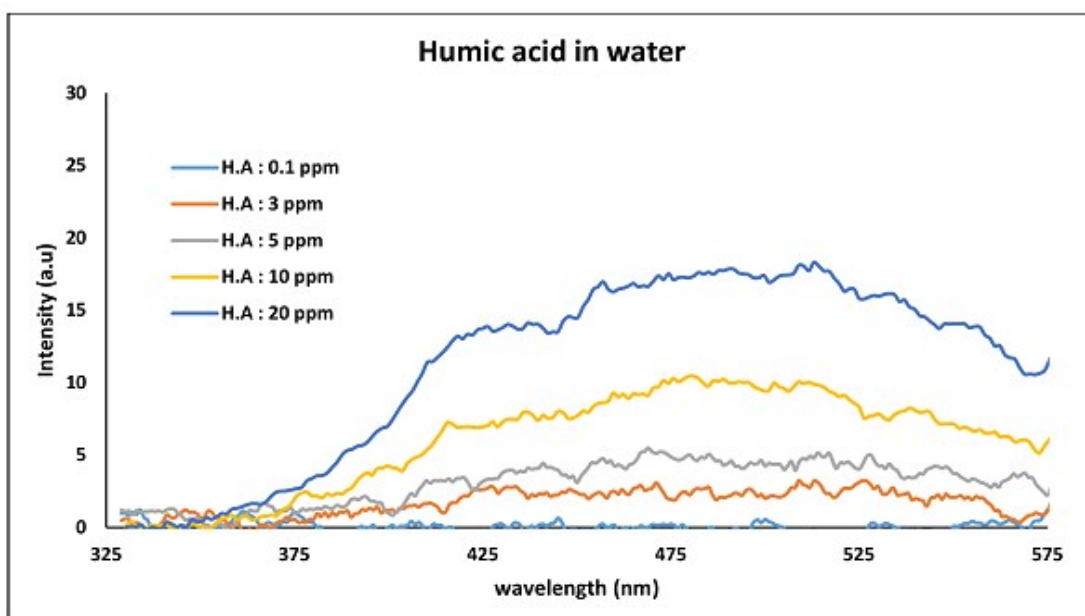

Figure S4 : Humic acid intensity in water.

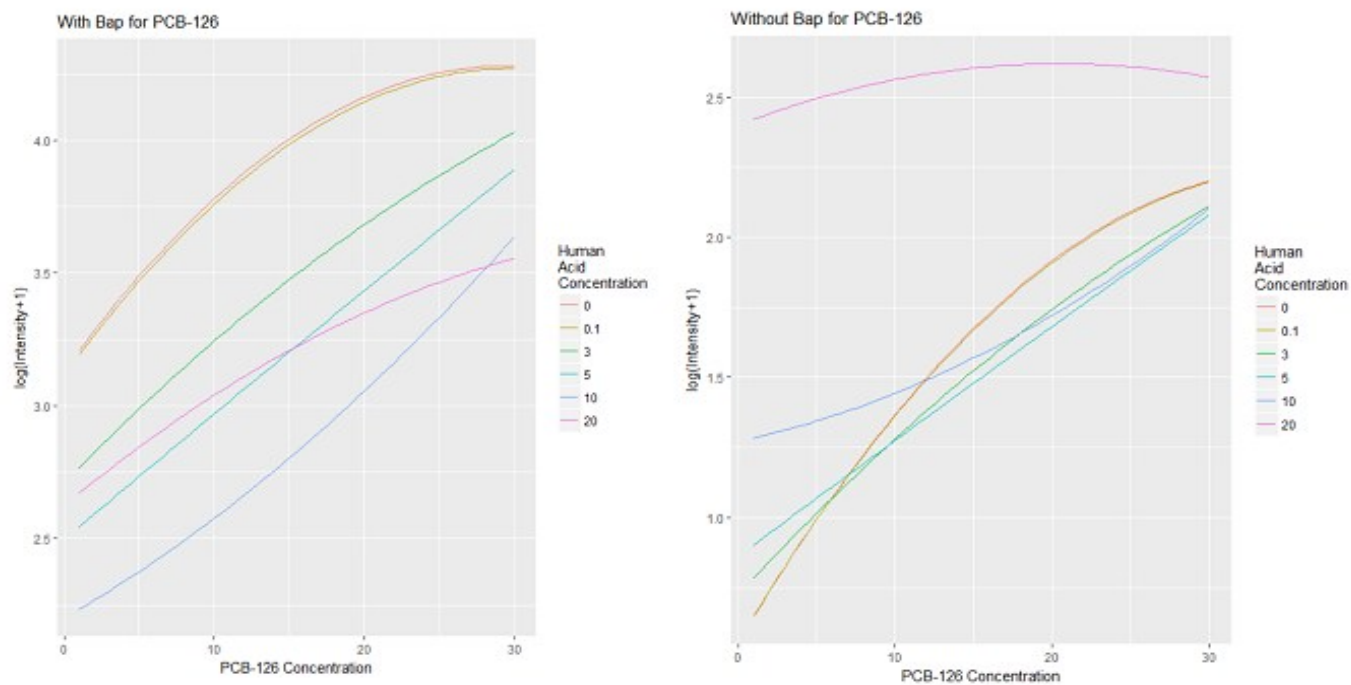

Figure S5(a,b) Predicted intensity for different concentrations of PCB-126 for different humic acid concentrations in the presence and absence of BaP. Y-axis represents “log (intensity) + 1”

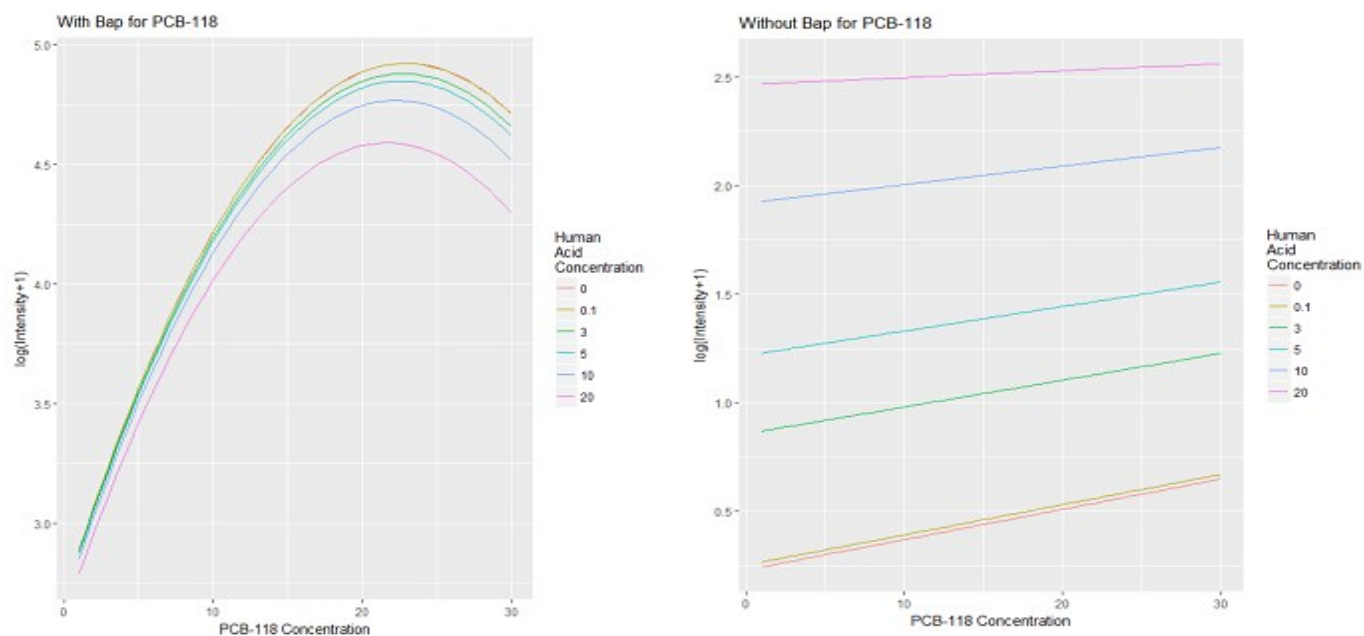

Figure S6(a,b): Predicted intensity for different concentrations of PCB-118 for different humic acid concentrations in the presence and absence of BaP. Y-axis represents “log (intensity) + 1”

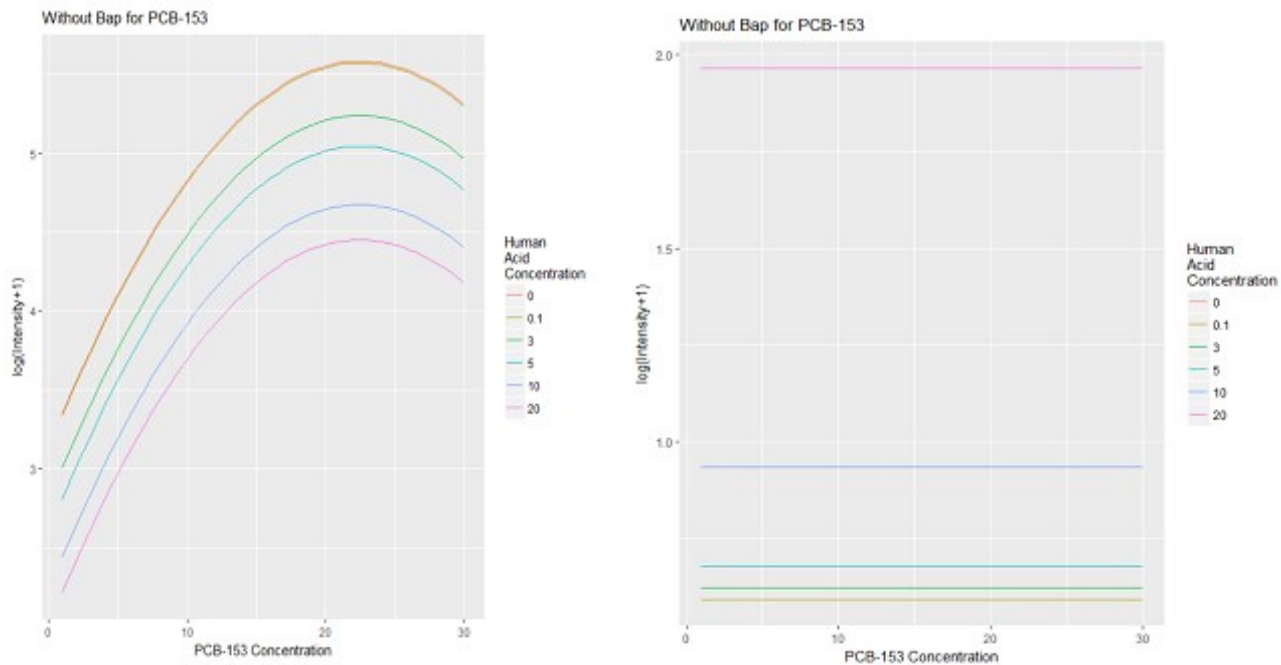

Figure S7(a,b): Predicted intensity for different concentrations of PCB-153 for different humic acid concentrations in the presence and absence of BaP. Y-axis represents “log (intensity) + 1”
